# Supplementary material for: Preparation and characterization of Fe–ZnO cellulose-based nanofiber mats with self-sterilizing photocatalytic activity to enhance antibacterial applications under visible light
Source: Royal Society of Chemistry journal article supplement (doi:10.1039/d4ra03136a), 2024-01-01
Supplement: d4ra03136a1.pdf [file d4ra03136a1.pdf]

## Supplementary data

Preparation and characterization of Fe-ZnO cellulose based nanofiber mats with a self-sterilizing photocatalytic activity for enhanced antimicrobial applications using visible light

Kithmini Ranathunga<sup>a#</sup>, Piumika Yapa<sup>a#</sup>, Imalka Munaweera<sup>a</sup>, M.M. Weerasekera<sup>b</sup>, Chanaka Sandaruwan<sup>c</sup>

<sup>a</sup> Department of Chemistry, Faculty of Applied Sciences, University of Sri Jayewardenepura, Nugegoda, Sri Lanka.

<sup>b</sup> Department of Microbiology, Faculty of Medical Sciences, University of Sri Jayewardenepura, Nugegoda, Sri Lanka.

<sup>c</sup> Sri Lanka Institute of Nanotechnology (SLINTEC), Homagama, Sri Lanka.

<sup>#</sup>equally contributed

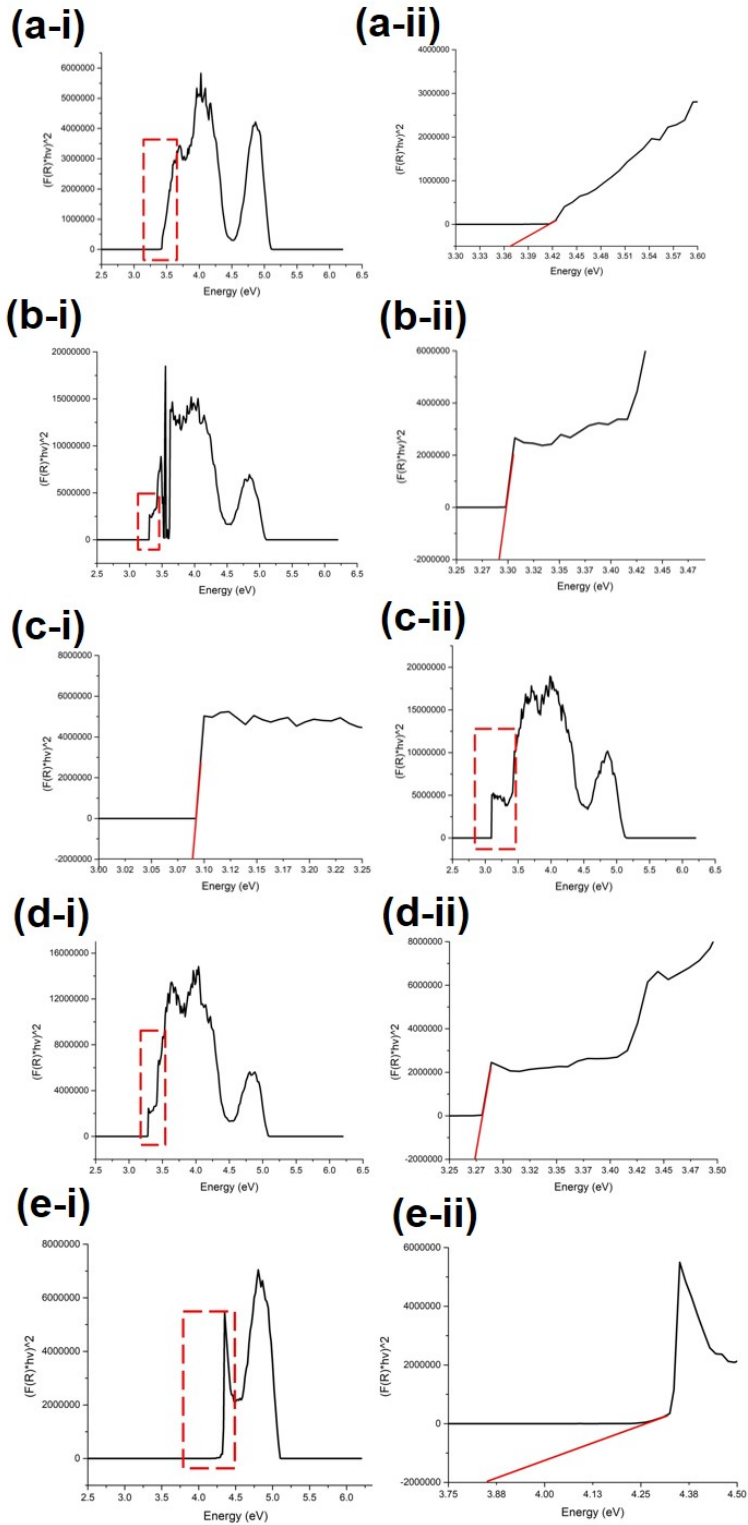

Figure S1: Tauc plots of (a-i) ZnO – long range, (a-ii) ZnO – short range, (b-i) Fe 3% - ZnO – long range, (b-ii) Fe 3% - ZnO – short range, (c-i) Fe 5% - ZnO – long range, (c-ii) Fe 5% - ZnO – short range, (d-i) Fe 7% - ZnO – long range, (d-ii) Fe 7% - ZnO – short range, (e-i) Fe 10% - ZnO – long range, (e-ii) Fe 10% - ZnO – short range .

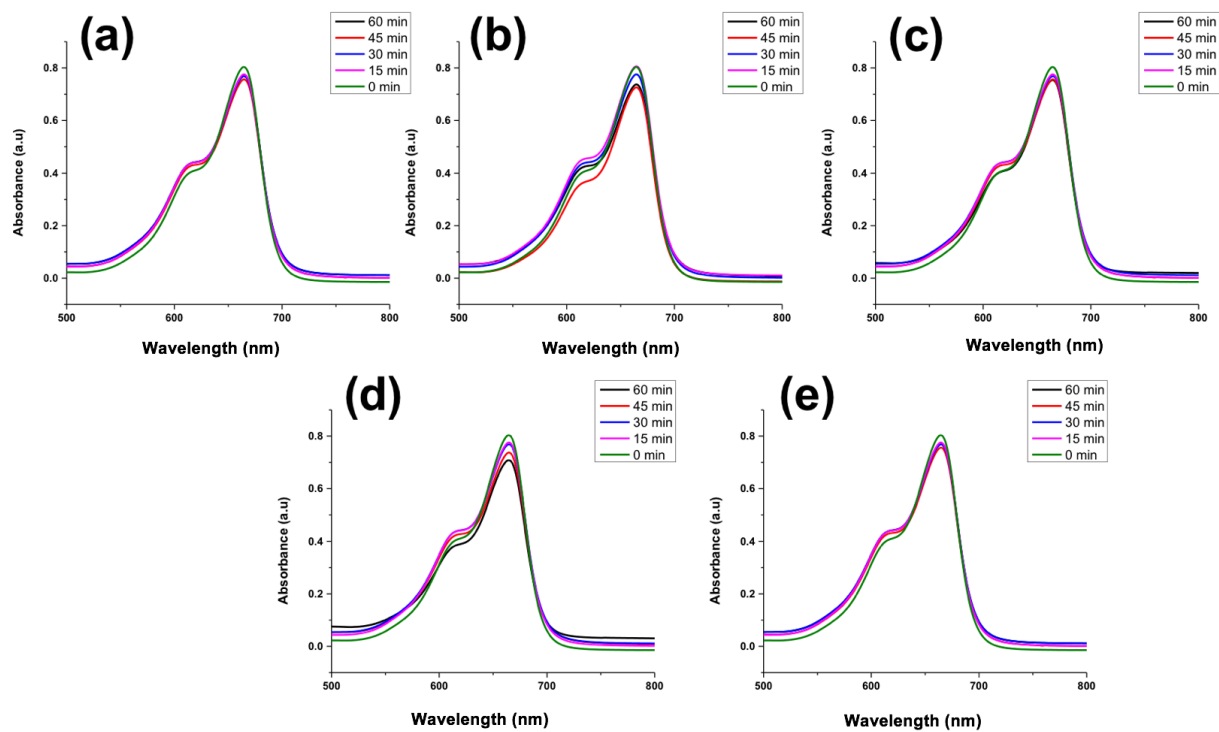

Figure S2: UV-Vis absorbance spectra for the degradation of MB dye under dark; (a) ZnO, (b) Fe 3% - ZnO, (c) Fe 5% - ZnO, (d) Fe 7% - ZnO, (e) Fe 10% - ZnO.

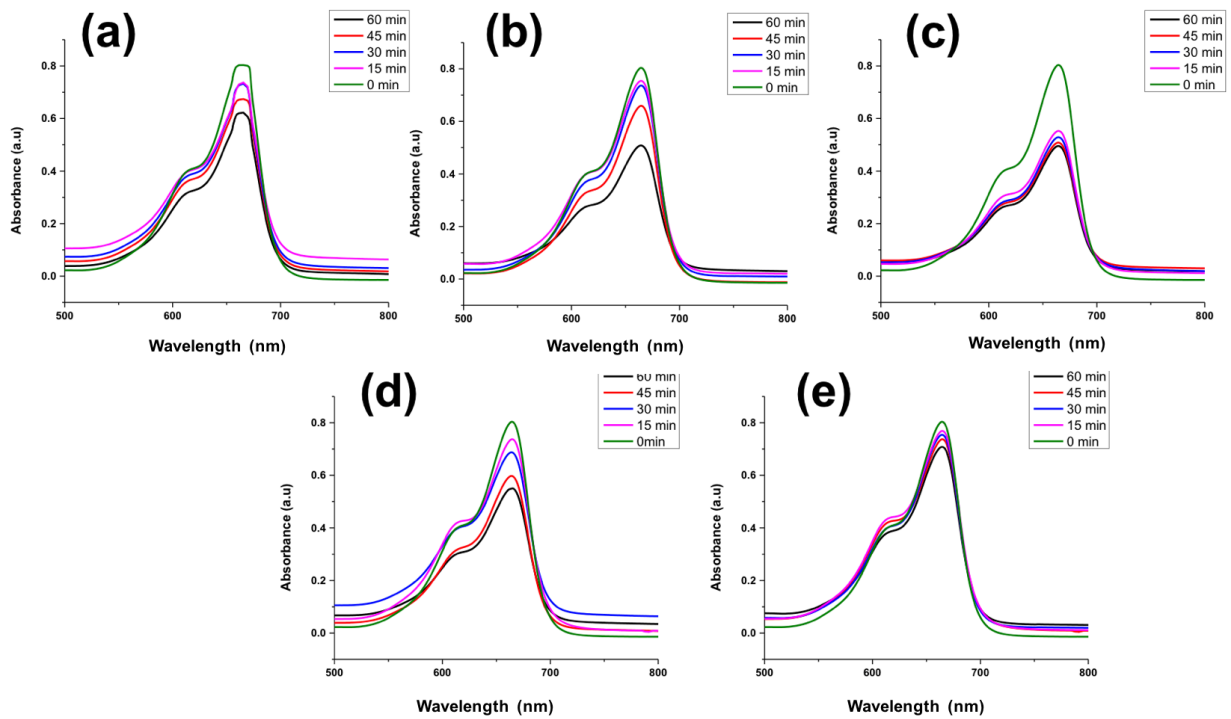

Figure S3: UV-Vis absorbance spectra for the degradation of MB dye under visible light lamp; (a) ZnO, (b) Fe 3% - ZnO, (c) Fe 5% - ZnO, (d) Fe 7% - ZnO, (e) Fe 10% - ZnO.

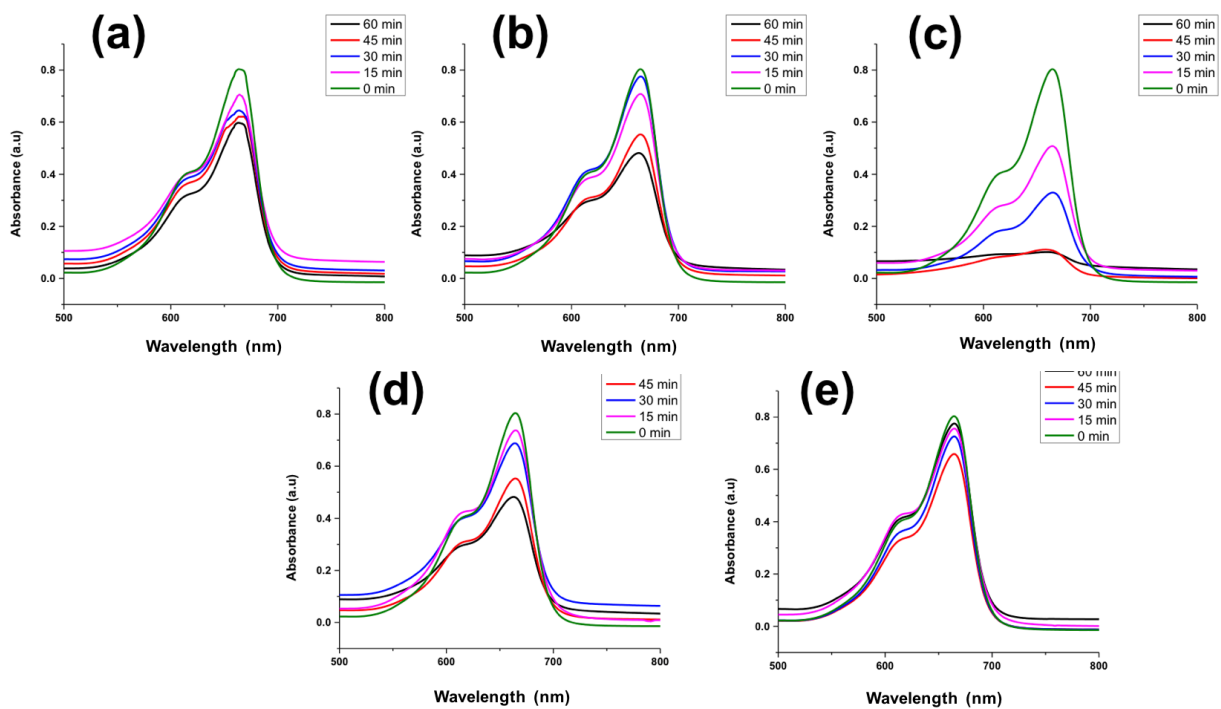

Figure S4: UV-Vis absorbance spectra for the degradation of MB dye under sunlight; (a) ZnO, (b) Fe 3% - ZnO, (c) Fe 5% - ZnO, (d) Fe 7% - ZnO, (e) Fe 10% - ZnO.

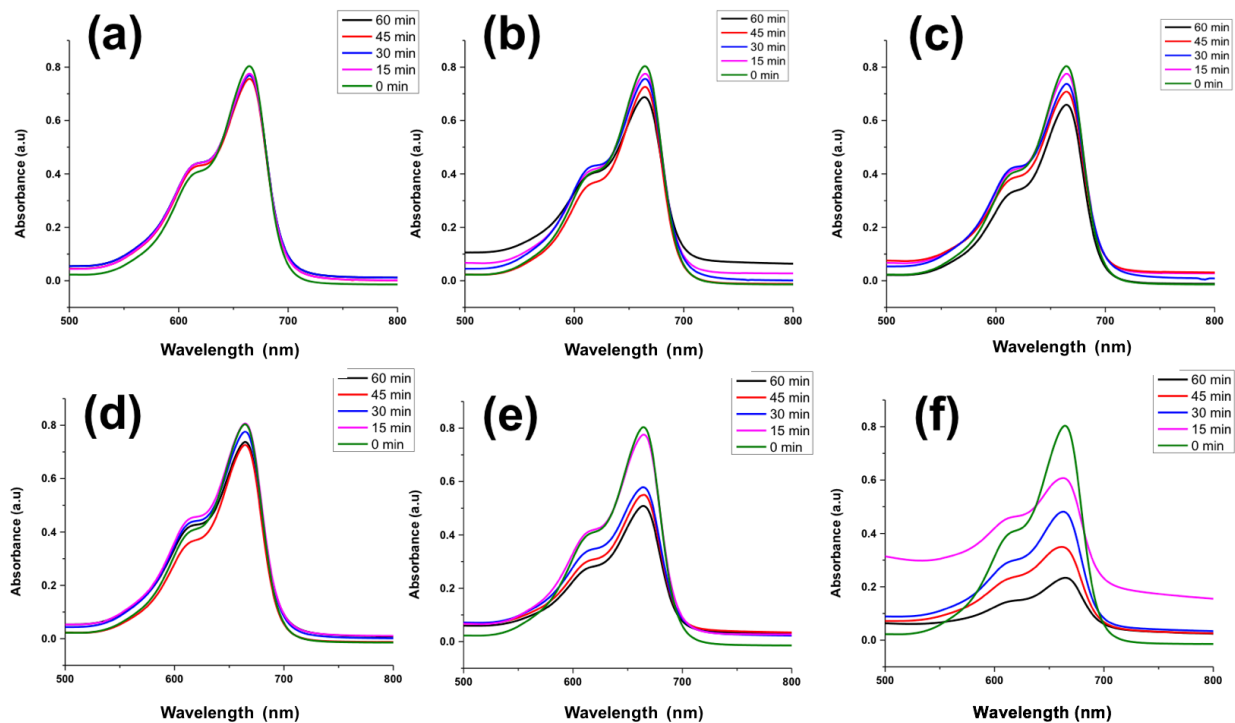

Figure S5: UV-Vis absorbance spectra for the degradation of MB dye for ZnO/CA fiber mat; (a) under dark, (b) under lamp, (c) under sunlight; UV-Vis absorbance spectra for the degradation of MB dye for Fe 5% ZnO/CA fiber mat; (d) under dark, (e) under lamp, (f) under sunlight.
